# Supplementary material for: Dynamics of Traditional Healthcare Knowledge Transmission and Practice in Rural Nigeria: A Case Study of Egbejila Community
Source: Research Square preprint supplement (doi:10.21203/rs.3.rs-6352159/v1), 2025-08-06
Supplement: Supplementary file 1 [file 3ffbadd78bc8defde9f2e747.pdf]

## **Interview guide For Traditional Healthcare Practitioners**

### **A. Background & Experience**

1. Can you please introduce yourself and describe your role in traditional healthcare?
2. How many years have you been practising?
3. How did you learn or inherit your knowledge and skills?
5. What specific types of therapies or treatments do you offer (e.g., Tewe-tegbo, balsam, Apaaron, etc.)?
5. Are there spiritual or religious elements involved in your practice?

### **B. Knowledge Transmission & Cultural Significance**

6. How is traditional medical knowledge passed down in your community?
7. What do you believe are the cultural values or beliefs behind the therapies you offer?
8. Are there any taboos, rituals, or rules that must be followed during treatments?

### **C. Practice & Community Interaction**

9. What kinds of health problems do people commonly bring to you and how do you diagnose them?
10. Who seeks your services the most — women, men, children, elderly?
11. Do you collaborate with or refer people to formal healthcare services?

### **D. Perception & Modern Healthcare**

12. How do you perceive the role of modern medicine in the community?
13. Do you think traditional and modern healthcare systems can work together?
14. What challenges do you face in continuing or preserving your practice?
15. What do you think are the most important things people outside this community should understand about traditional healthcare here?

## **Interview guide For Community Inhabitants (TH Users)**

### **A. Personal Background & Health Practices**

1. Can you tell me a little about yourself (age, family, occupation, religious affiliation)?
2. Have you ever used traditional healthcare? If yes, for what kinds of health issues?
3. How often do you seek traditional healthcare compared to modern healthcare?

### **B. Beliefs, Preferences, and Experiences**

4. What makes you choose traditional healthcare over hospital treatment (or vice versa)?
5. What kinds of therapies or treatments have you received?
6. Can you describe a personal experience where traditional healthcare helped you or a family member?

### **C. Trust, Risks, and Accessibility**

7. Do you trust traditional healthcare practitioners? Why or why not?
8. Are there any risks or concerns associated with using traditional healthcare in your opinion?
9. Is it more affordable and accessible than modern healthcare?

### **D. Cultural Identity and Continuity**

10. Do you think traditional healthcare should be preserved for future generations?
11. What role does your religion, culture, or family play in your decision to use traditional medicine?
11. Would you support the integration of traditional practices into the national healthcare system?
12. Is there anything you would like to add that we haven't covered?
